# Supplementary material
Source: PubMed Central journal article supplement (PMC3365708)
Supplement: supp_M112.355578_jbc.M112.355578-1.pdf [file supp_M112.355578_jbc.M112.355578-1.pdf]

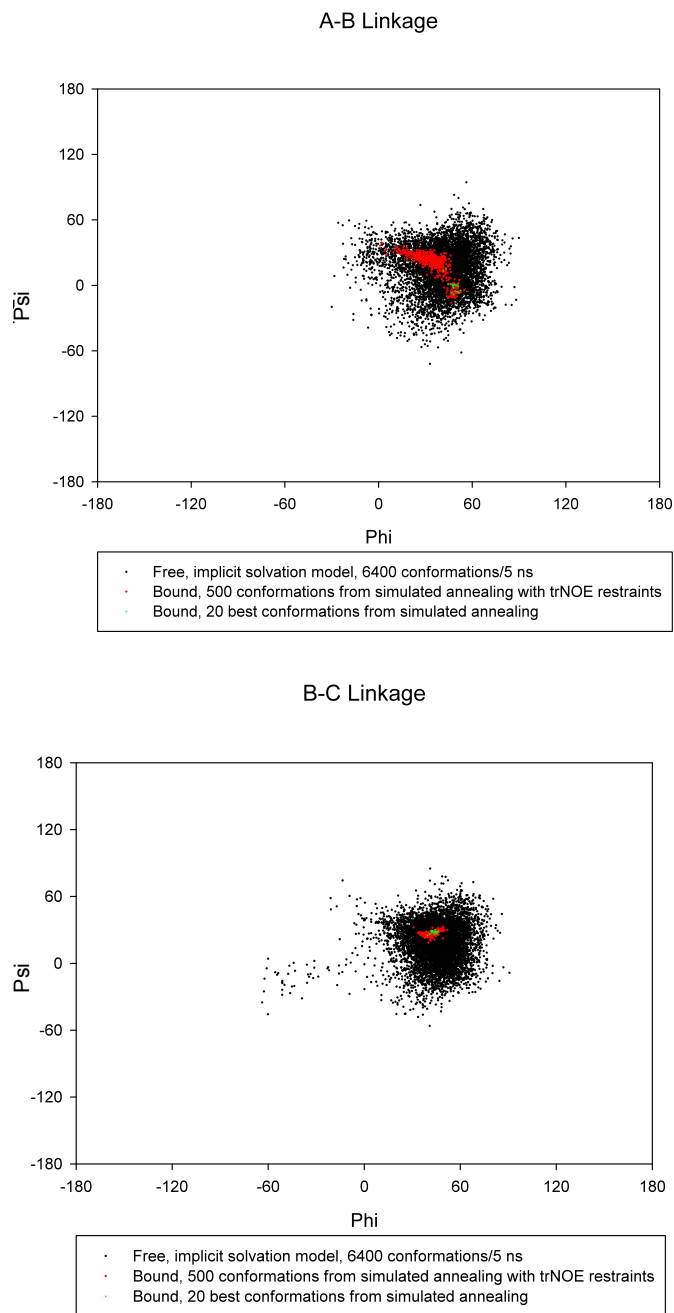

**FIGURE S1.** Scatter plots of  $\phi$  vs.  $\psi$  of **2** from molecular dynamics simulations at 298 K with the GLYCAM06g force field and the generalized Born implicit solvation model. Black dots, 6400 conformations from a 5 ns simulation without NMR restraints; red dots, 500 conformations from simulated annealing.
