# Supplementary material
Source: PubMed Central journal article supplement (PMC3365708)
Supplement: supp_M112.355578_jbc.M112.355578-2.pdf [file supp_M112.355578_jbc.M112.355578-2.pdf]

Relaxed Energy Contour Plot for Man( $\beta$ 1-2)Man( $\beta$ OMe)

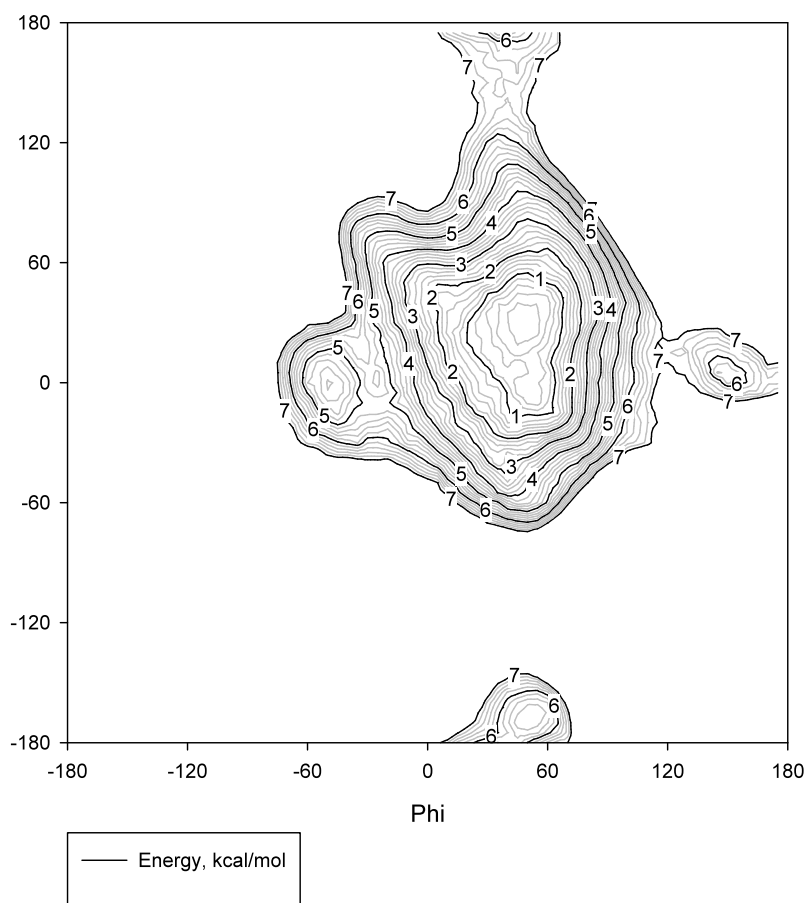

**FIGURE S2.** Relaxed potential energy contour plot for the Man( $\beta$ 1-2)Man( $\beta$ OMe) disaccharide. Energy contours are labeled every 1 kcal/mol up to 7 kcal/mol above the global minimum of  $\sim 50^\circ, 30^\circ$ . The plot was generated by restraining the dihedral angles to within  $\pm 0.5^\circ$  with a large force constant, then carrying out 30 ps of molecular dynamics at 300 K with the GLYCAM06g force field to relax the rest of the molecule; this was repeated after incrementing the  $\phi$  and  $\psi$  dihedral angles in  $5^\circ$  steps. The resulting data were smoothed and plotted with SigmaPlot 11.0 for Windows.
