# Supplementary material
Source: PubMed Central journal article supplement (PMC3365708)
Supplement: supp_M112.355578_jbc.M112.355578-3.pdf [file supp_M112.355578_jbc.M112.355578-3.pdf]

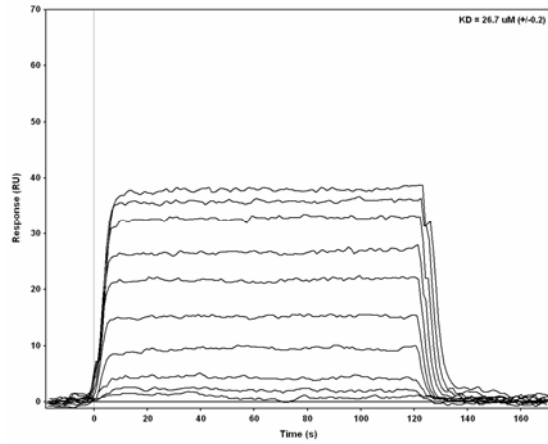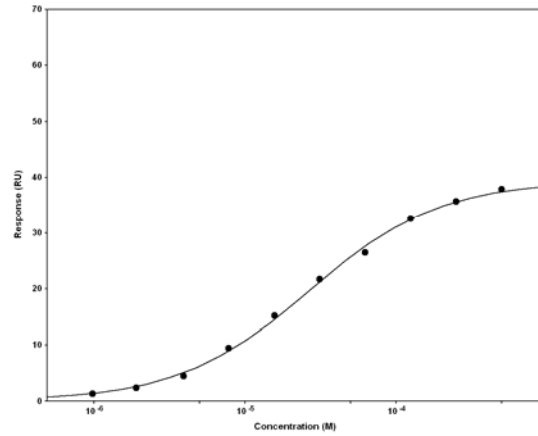

(a)

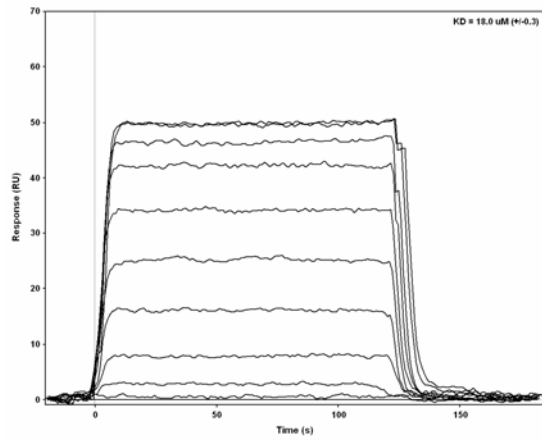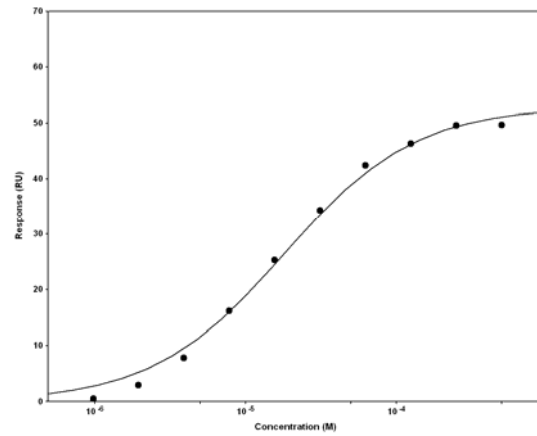

(b)

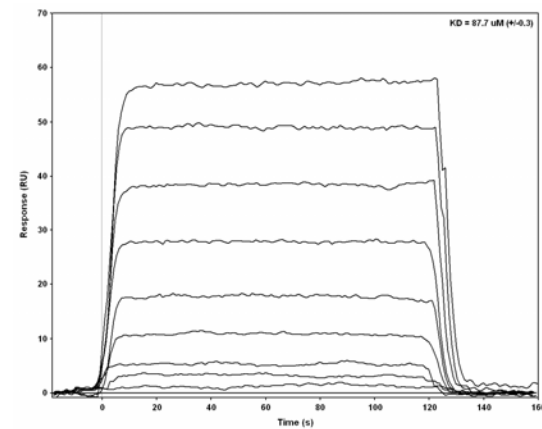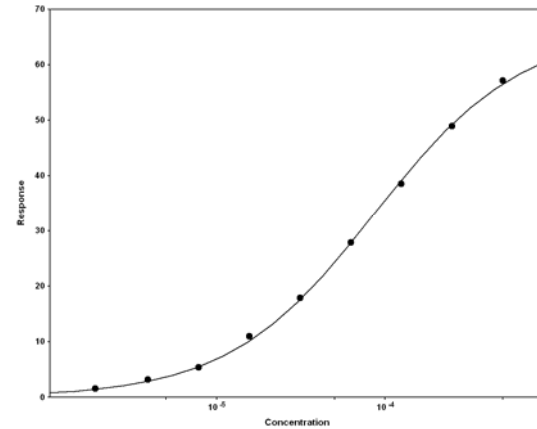

(c)

**FIGURE S3.** Surface plasmon resonance of C3.1 scFv binding to (a) **1**, (b) **2**, and (c) **3** at equilibrium. Representative sensograms (left panels) and fits of the response at equilibrium (right panels) from the SPR binding assays. Numbers in brackets are the standard deviation.
