# Supplementary material
Source: PubMed Central journal article supplement (PMC3365708)
Supplement: supp_M112.355578_jbc.M112.355578-4.pdf [file supp_M112.355578_jbc.M112.355578-4.pdf]

**TABLE S1.** Saturation transfer double difference (STDD) enhancements (%) for compounds **1–3** binding to antibody C3.1. Enhancements are normalized to the strongest signal in each spectrum.

| Resonance              | STDD Enhancement (%) |        |         |                       |        |         |
|------------------------|----------------------|--------|---------|-----------------------|--------|---------|
|                        | 1, IgG               | 2, IgG | 2, scFv | 2, scFv, higher power | 3, IgG | 3, scFv |
| Isolated resonances    |                      |        |         |                       |        |         |
| H1A                    | 73                   | 87     | 100     | 100                   | 64     | 15      |
| H2A                    | 86                   | 76     | 28      | 37                    | 96     | 39      |
| H3A                    |                      | 100    | 52      | 63                    |        |         |
| H4A                    |                      | 60     | 28      | 37                    |        |         |
| H1B                    | 55                   | 47     | 49      | 59                    | 82     | 100     |
| H2B                    | 64                   | 44     | 13      | 19                    | 90     | 42      |
| H1C                    |                      | 31     | 8       | 14                    | 43     | 21      |
| H2C                    |                      | 49     | 8       | 11                    | 36     | 15      |
| H1D                    |                      |        |         |                       | 40     | 4       |
| H2D                    |                      |        |         |                       | 58     | 15      |
| Pr 1-CH                |                      | 53     | 5       | 12                    | 61     | 7       |
| Pr 2-CH2               |                      | 29     | 4       | 7                     | 50     | 12      |
| Pr 3-CH3               |                      | 24     | 3       | 7                     | 50     | 13      |
| OCH <sub>3</sub>       | 50                   |        |         |                       |        |         |
| Overlapping resonances |                      |        |         |                       |        |         |
| H5 (all)               | 82                   | 64     | 31      | 39                    | 78     | 55      |
| H6 (all)               | 66                   | 56     | 20      | 21                    | 60     | 17      |
| H6' (all)              | 73                   | 53     | 26      | 22                    | 62     | 15      |
| H3AB                   | 77                   |        |         |                       | 100    | 57      |
| H4AB                   | 100                  |        |         |                       | 87     | 57      |
| H3CD, H4CD, Pr 1'CH    |                      |        |         |                       | 55     | 18      |
| H3BC, H4BC, Pr 1'CH    |                      | 58     | 16      | 31                    |        |         |
